# Supplementary material for: Gliogenic Potential of Single Pallial Radial Glial Cells in Lower Cortical Layers
Source: MDPI journal article supplement (doi:10.3390/cells10113237), 2021-11-19
Supplement: s1 [file s1]

Supplementary material.

## Gliogenic Potential Of Single Pallial Radial Glial Cells in Lower Cortical Layers

Ana Cristina Ojalvo-Sanz 1,# and Laura López-Mascaraque 1,\*

Table S1. Clones analyzed in the progeny of E14-GFAP-progenitor cells

| Animal | Clone_digital code * | Clone cell type | Clone type    | Clonal size | Number cells and location ** | R-C dispersión *** | Cortical dispersion **** | IHC *****                           |
|--------|----------------------|-----------------|---------------|-------------|------------------------------|--------------------|--------------------------|-------------------------------------|
| A1     | 10a_103056 103056    | Astrocytes      | uniform clone | 22          | 4- UL; 18-LL                 | 150                | LL+UL                    | Olig2                               |
| A1     | 1c_120000 003056     | Astrocytes      | uniform clone | 7           | 6-LL                         | 100                | LL                       | Olig2                               |
| A1     | 2a_003006 003056     | Astrocytes      | uniform clone | 10          | 10-LL                        | 250                | LL                       | Olig2; NeuN                         |
| A1     | 4a_000400 120400     | Astrocytes      | uniform clone | 20          | 7-UL; 13-LL                  | 300                | LL+UL                    | Olig2; NeuN; APC                    |
| A1     | 9a_123056 123456     | Astrocytes      | uniform clone | 30          | 30- LL                       | 250                | LL                       | NeuN; S100 $\beta$ ; PDGFR $\alpha$ |
| A2     | 4a_120000 123400     | Astrocytes      | uniform clone | 7           | 7-LL                         | 150                | LL                       | APC                                 |
| A2     | 5b_123000 123006     | Astrocytes      | uniform clone | 4           | 4-LL                         | 50                 | LL                       | S100 $\beta$                        |
| A2     | 6a_003000 000406     | Astrocytes      | uniform clone | 14          | 10-UL; 4 LL                  | 150                | LL+UL                    | Olig2; APC                          |
| A3     | 10a_123000 12000     | Astrocytes      | uniform clone | 6           | 5-UL; 1-LL                   | 200                | LL+UL                    | Olig2; S100 $\beta$                 |
| A3     | 12c_000056 120056    | Astrocytes      | uniform clone | 8           | 8_LL                         | 100                | LL                       | S100 $\beta$                        |
| A2     | 2b_000400 003456     | Astrocytes      | uniform clone | 6           | 2-UL; 4-LL                   | 100                | LL+UL                    | PDGFR $\alpha$                      |
| A2     | 8a_100000 000456     | Astrocytes      | uniform clone | 12          | 7-UL; 5-LL                   |                    | LL+UL                    | APC; Olig2                          |
| A1     | 4b_120000 000400     | NG2-glia        | uniform clone | 18          | 8-LL; 3-CC                   | 150                | LL + CC                  | Olig2; PDGFFR $\alpha$ ; APC        |
| A1     | 6a_003400 000400     | NG2-glia        | uniform clone | 11          | 11-LL                        | 50                 | LL                       | Olig2                               |
| A1     | 7a_020006 000406     | NG2-glia        | uniform clone | 29          | 29-LL                        | 250                | LL                       | Olig2-APC-S100 $\beta$              |
| A1     | 9b_123000 100456     | NG2-glia        | uniform clone | 5           | 5-LL                         | 50                 | LL                       | PDGFR $\alpha$                      |
| A2     | 10a_000000 123000    | NG2-glia        | uniform clone | 14          | 14-LL                        | 50                 | LL                       | PDGFR $\alpha$                      |
| A2     | 1a_103000 023456     | NG2-glia        | uniform clone | 21          | 22-LL                        | 100                | LL                       | S100 $\beta$                        |

| Animal | Clone_digital code * | Clone cell type               | Clone type    | Clonal size | Number cells and location **  | R-C dispersión *** | Cortical dispersion **** | IHC *****                                 |
|--------|----------------------|-------------------------------|---------------|-------------|-------------------------------|--------------------|--------------------------|-------------------------------------------|
| A2     | 5a_120006 123006     | NG2-glia                      | uniform clone | 32          | 30-LL                         | 100                | LL+UL                    | PDGFR $\alpha$ , Olig2                    |
| A2     | 8b_100000 100456     | NG2-glia                      | uniform clone | 11          | 11-LL                         | 100                | LL                       | Olig2                                     |
| A2     | 9a_023000 000400     | NG2-glia                      | uniform clone | 5           | 5-LL                          | 50                 | LL                       | S100 $\beta$                              |
| A3     | 15a_000400 000456    | NG2-glia                      | uniform clone | 21          | 24-LL                         | 300                | LL                       | Olig2; S100 $\beta$                       |
| A3     | 15b_000456 000450    | NG2-glia                      | uniform clone | 12          | 6-LL; 6-CC                    | 50                 | LL + CC                  | Olig2, PDGFR $\alpha$                     |
| A3     | 4b_003406 000050     | NG2-glia                      | uniform clone | 11          | 12-LL                         | 50                 | LL                       | Olig2                                     |
| A3     | 4c_000400 003456     | NG2-glia                      | uniform clone | 22          | 22-LL                         | 200                | LL                       | Olig2, APC; PDGFR $\alpha$                |
| A3     | 5a_100000 000400     | NG2-glia                      | uniform clone | 7           | 7_LL                          | 150                | LL                       | PDGFR $\alpha$                            |
| A3     | 6c_123400 100056     | NG2-glia                      | uniform clone | 7           | 2-LL; 4-CC                    | 100                | LL                       | Olig2                                     |
| A1     | 1a_000000 123056     | Oligodendrocytes              | uniform clone | 12          | 11-LL                         | 200                | LL                       | APC; Olig2; PDGFR $\alpha$ ; S100 $\beta$ |
| A2     | 1b_100006 123456     | Oligodendrocytes              | uniform clone | 19          | 10-LL; 8-CC                   | 50                 | LL + CC                  | S100 $\beta$                              |
| A2     | 2a_003000 000456     | Oligodendrocytes              | uniform clone | 7           | 7-LL                          | 50                 | LL                       | PDGFR $\alpha$                            |
| A2     | 9a_023000 000400     | Oligodendrocytes              | uniform clone | 5           | 5-LL                          | 50                 | LL                       | PDGFR $\alpha$                            |
| A3     | 12d_100000 120056    | Oligodendrocytes              | uniform clone | 13          | 3-LL; 10-CC                   | 150                | LL + CC                  | S100 $\beta$                              |
| A3     | 14a_120000 120006    | Oligodendrocytes              | uniform clone | 23          | 6-LL; 17-CC                   | 200                | LL + CC                  | S100 $\beta$ , PDGFR $\alpha$             |
| A3     | 16a_020400 003456    | Oligodendrocytes              | uniform clone | 7           | 7-LL                          | 100                | LL                       | Olig2, PDGFR $\alpha$                     |
| A3     | 6a_100006 123456     | Oligodendrocytes              | uniform clone | 4           | 4-LL                          | 50                 | LL                       | S100 $\beta$                              |
| A1     | 1b_120006 103050     | NG2-glia<br>+Oligodendrcoytes | uniform clone | 19          | NG2glia: 7-CC +<br>OLs: 11-LL | 150                | LL+UL                    | APC                                       |
| A3     | 3a_100006 123456     | NG2-glia<br>+Oligodendrcoytes | uniform clone | 22          | NG2glia: 19-UL +<br>OLs: 3-LL | 150                | LL                       | S100 $\beta$ ; Olig2                      |

| Animal | Clone_digital code * | Clone cell type            | Clone type    | Clonal size | Number cells and location **                 | R-C dispersión *** | Cortical dispersion **** | IHC *****                                  |
|--------|----------------------|----------------------------|---------------|-------------|----------------------------------------------|--------------------|--------------------------|--------------------------------------------|
| A2     | 8b_100000 100456     | NG2-glia +Oligodendrocytes | uniform clone | 10          | NG2glia: 6_LL + OLs: 4- CC                   | 100                | LL + CC                  | PDGFR $\alpha$ ;                           |
| A2     | 12a_ 100400 120456   | NG2-glia +Oligodendrocytes | uniform clone | 23          | NG2glia:18-LL+ OL:5-CC                       | 100                | LL+CC                    | S100 $\beta$ ; Olig2                       |
| A3     | 13a_000006 000400    | NG2-glia +Oligodendrocytes | uniform clone | 15          | NG2glia: 5-LL + OLs: 10-UL                   | 100                | LL                       | S100 $\beta$ ; APC                         |
| A1     | 5a_000056 103456     | NG2glia + Astrocytes       | mixed clone   | 11          | Ast: 9-LL; 3-UL + NG2glia: 5-LL              | 250                | LL+UL                    | S100 $\beta$ ; APC                         |
| A2     | 3a_120000 100000     | NG2glia + Astrocytes       | mixed clone   | 49          | Ast: 8-UL; 21-LL;3-CC + NG2glia: 13-LL; 7 CC | 350                | LL+UL                    | S100 $\beta$ , APC, PDGFR $\alpha$ , Olig2 |
| A2     | 7a_000006 003056     | NG2glia + Astrocytes       | mixed clone   | 38          | Ast: 3-UL + NG2glia: 30-LL; 5-CC             | 300                | LL+UL                    | S100 $\beta$ ; Olig2                       |
| A1     | 3a_000000 103006     | OLs + Astrocytes           | mixed clone   | 15          | Ast.: 2-UL; 6-LL + OL: 7-CC                  | 250                | LL + CC                  | APC; S100 $\beta$                          |
| A3     | 1a_120406 123406     | OLs + Astrocytes           | mixed clone   | 11          | Ast: 6-LL + OL: 5-CC                         | 150                | LL + CC                  | S100 $\beta$ ; Olig2; APC                  |
| A3     | 8a_100400 020400     | OLs + Astrocytes           | mixed clone   | 12          | Ast: 6-UL + OL: 6-LL                         | 100                | LL + CC                  | Olig2; S100 $\beta$                        |

\* Twelve number code of the presence of YFP-1, mKO-2, mCerulean-3, mCherry-4, mT-sapphire-5, EGFP-6 or absence-0, first cytoplasm and later nuclear.

\*\* Number of cells located in upper cortical layers (UL), lower cortical layers (LL) or corpus callosum (CC).Ast: astrocytes; OL: oligodendrocytes.

\*\*\* Total distance between the first and the last cells that compose a clone, considering that thickness of the sections are 50 $\mu$ m.

\*\*\*\* Dispersion of sibling cells that compose a clone in cortical layers.

\*\*\*\*\* Immunohistochemistry in section where sibling cells are located that help to corroborate or discard the cell type identified with morphological characteristics.
